# Utilizing Q-Learning to Generate 3D Vascular Networks for Bioprinting Bone

Ashkan Sedigh<sup>1,2</sup>, Jacob E. Tulipan<sup>1,2</sup>, Michael R. Rivlin<sup>1,2</sup>, Ryan E. Tomlinson<sup>1</sup>

<sup>1</sup> Department of Orthopaedic Surgery, Thomas Jefferson University, Philadelphia, PA

<sup>2</sup> Division of Hand Surgery, The Rothman Orthopaedic Institute, Philadelphia, PA.

Address correspondence to: Ryan Tomlinson, PhD, 1015 Walnut Street, Department of Orthopaedic Surgery, Thomas Jefferson University, Philadelphia, PA, 19107, USA. E-mail: [ryan.tomlinson@jefferson.edu](mailto:ryan.tomlinson@jefferson.edu)

## **ABSTRACT:**

Bioprinting is an emerging tissue engineering method used to generate cell-laden scaffolds with high spatial resolution. Bioprinted vascularized bone grafts are a potential application of this technology that would meet a critical clinical need, since current approaches to volumetric bone repair have significant limitations. However, generation of vascular networks suitable for bioprinting is challenging. Here, we propose a novel Q-learning approach to quickly generate 3D vascular networks within patient-specific bone geometry that are optimized for bioprinting. First, the inlet and outlet locations are specified and the scenario is modeled using a grid world for initial agent training. Next, the path planned in the grid world environment is converted to a Bezier curve, which is then used to generate the final 3D vascularized bone model. The vessels generated using this procedure have minimal tortuosity, which increases the likelihood of successful bioprinting. Furthermore, the ability to specify inlet and outlet position is necessary for both surgical feasibility as well as generation of more complex vascular networks. In total, this study demonstrates the reliability of our reinforcement learning method for automated generation of 3D vascular networks within patient-specific geometry that can be used for bioprinting vascularized bone grafts.

## **KEY WORDS:**

Bioprinting, Q-learning, Reinforcement Learning, Vascularization, 3D Modeling

## 33 I. Introduction

34  
35 Regenerative medicine is an emerging field that seeks to develop methods to regrow or  
36 replace damaged, diseased, or missing tissues with synthesized tissue that restores  
37 normal function [1][2]. The development of a regenerative medicine approach to generate  
38 new bone and cartilage for treatment of degenerative joint diseases has been an active  
39 research area for many years [3]. However, the bone and/or cartilage constructs  
40 generated using standard tissue engineering strategies lack the spatial complexity of  
41 native tissue. In this regard, bioprinting, which utilizes 3D printing technology to generate  
42 tissue using materials containing viable cells, may be a solution for generating patient-  
43 specific tissue for bone grafting [4].

44  
45 Bioprinting is a growing field that is expected to significantly impact clinical practice by  
46 enabling new regenerative medicine approaches. In general, bioprinted constructs are  
47 generated by sequentially printing thin layers of specific materials, such as hydrogels,  
48 collagen, and bioceramics, that are laden with cells. The layer geometry is stored in a G-  
49 code file that the bioprinter translates to extrude the particular material. With the potential  
50 to produce a specific 3D shape containing cells at high resolution, 3D bioprinting has  
51 become a popular biofabrication method for researchers [5]. In particular, bioprinting a  
52 vascularized bone tissue construct would be a significant improvement over current  
53 efforts [6][7] and would directly meet a pressing clinical need.

54  
55 In particular, strategies to repair large bone defects in humans in scenarios such as  
56 neoplasm, trauma, reconstruction, and infection are limited [8]. Osteoconductive bone  
57 substitutes can be used to provide a scaffold for mineralization by native osteoblasts but  
58 are limited by the slow rate and limited reach of bony ingrowth, technical difficulties  
59 shaping the construct, and concerns about structural strength [9]. Similarly, bone allograft  
60 is also limited by the rate of host bone ingrowth and has the added complications of donor  
61 availability and attritional weakening of the allograft [10]. Although autograft bone contains  
62 living cells able to produce new bone, it cannot be used to treat large defects due to  
63 diffusion limiting the ability of cells in the center of a large graft mass to obtain nutrients  
64 and remove waste products, ultimately resulting in fatigue failure [11]. Vascularized bone  
65 grafts, which utilize the native vascularity of a bone graft to accomplish nutrient and waste  
66 exchange, were introduced to address this major limitation [12]. Unfortunately,  
67 vascularized bone donor sites are limited in number, size, and contour. Furthermore,  
68 harvesting these grafts results in added patient morbidity, and their implantation requires  
69 considerable technical skill [13]. In total, there are many clinical scenarios of volumetric  
70 bone loss lacking a suitable method for treatment.

71  
72 Since the skeletal vascular network is critical to native bone mineralization and graft  
73 survival [14], bioprinted bone intended for the treatment of large defects must be  
74 effectively vascularized. As a result, this requirement necessitates the design of a 3D  
75 vascular network within the bioprinted bone. We have developed a novel method to  
76 implement a vascular network using patient-specific geometry at the desired vascular  
77 density with customizable inlet and outlet positions by optimizing tortuosity using  
78 Reinforcement Learning (RL). This paper introduces the implemented learning method

79 and shows the mathematical convergence and validation for the learning method (termed  
80 Q-Learning). This method presents our 3D-to-2D projection, agent training, and a proper  
81 learning environment called the grid world path planning. Bezier curve approximation and  
82 2D-to-3D methods are described as the final steps to implement the imported geometry's  
83 computed vessels.

84

## 85 II. Q-Learning

86

87 Reinforcement Learning (RL) is a semi-supervised learning method that solves a task by  
88 trial and error by acting within an environment and calculating the feedback rewards for  
89 each taken action in order to maximize the accumulated reward [15], [16]. For each time  
90 step in which the agent takes an action, the environment transitions to a new state. The  
91 environment feedback is less informative than supervised learning and more informative  
92 than unsupervised learning since agents in unsupervised learning must discover the  
93 world without any explicit feedback [17].

94

95 RL contains Monte-Carlo learning, temporal difference, and dynamic programming  
96 learning. Q-learning and State-Action-Reward-State-Action (SARSA) are the two  
97 algorithms of temporal difference learning [18]. Single-agent RL algorithms are divided  
98 into both model-free and model-based methods. Model-based methods include dynamic-  
99 programming; on the other hand, model-free methods are based on an online estimation  
100 [17].

101

102 Markov Decision Process (MDP) describe the agent environment by the following  
103 definition.

104

105 *Definition 1:* A Markov decision process is defined as a tuple  $M = (X, A, p, r)$  where  $X$  is  
106 the countable, finite and continuous state space,  $A$  is the finite, continuous, and countable  
107 action space. For the dynamic environments, the transition probability is  $p(y|x, a)$  for any  
108  $x \in X$ ,  $y \in X$ , and  $a \in A$ . Equation (1) is the probability of observing a next state  $y$  when  
109 an agent take action  $a$  in the state space  $x$ .

110

$$111 p(y|x, a) = P (x_{t+1} = y | x_t = x, a_t = a) \quad (1)$$

112

113

114 *Definition 2:* Policy is a decision rule  $\pi_t$  is a state to action mapping at the time  $t \in \mathbb{N}$   
115 which is define as equation (2). In a Markovian process, policy is the sequence of decision  
116 rules  $\pi = (\pi, \pi, \pi, \dots)$ .

117

$$118 \pi(a/s) = P [A_t = a | S_t = s] \quad (2)$$

119

120 The agent's goal is to maximize the expected discounted return at each step time  $t$ , as  
121 shown in equation (3):

122

$$123 R_k = E [\sum_{j=0}^{\infty} \gamma^j r_{t+j+1}] \quad (3)$$

124

125 In equation (3),  $\gamma \in [0,1]$  is the discount factor, which is considered as the uncertainty  
126 regarding the received rewards in the future. Small  $\gamma$  looking for short-term rewards and  
127 values close to 1 look for the long-term rewards, which result in the exploration versus  
128 exploitation criteria.  $R_t$  represents the agent reward accumulated in the long process.  
129 According to the equation (3), in order to calculate the state value for infinite time with a  
130 discount factor, equation (4) is used:

$$131$$
$$132 \quad V^\pi(x) = E[\sum_{t=0}^{\infty} \gamma^t r(x_t, \pi(x_t)) | x_0 = x; \pi] \quad (4)$$
$$133$$

134 **Definition 3:** the state value function or  $Q$ -function for any policy  $\pi$ ,  $Q^\pi: X \times A \rightarrow \mathbb{R}$  is  
135 defined as equation (5):

$$136$$
$$137 \quad Q^\pi(x, a) = E[\sum_{t=0}^{\infty} \gamma^t r(x_t, \pi(x_t)) | x_0 = x, a_0 = a, a_t = \pi(x_t), \forall t \geq 1] \quad (5)$$
$$138$$

139 And the optimal  $Q$ -function describes as  $Q^*(x, a) = \max_{\pi} Q^\pi(x, a)$  as we deduce that the  
140 optimal policy is  $\pi^*(x) = \arg \max_{a \in A} Q^*(x, a)$ . The Bellman optimality equation defined as  
141 equation (6):

$$142$$
$$143 \quad Q^*(x, a) = \sum_{x' \in X} f(x, a, x') [r(x, a, x') + \gamma \max_{a'} Q^*(x', a')] \quad \forall x \in X, a \in A \quad (6)$$
$$144$$

145 Equation (6) states that the current value by taking action  $a$  in state space  $x$  is the  
146 expected immediate reward plus the optimal policy (discounted) from the future states  $x$ .  
147  $x'$  indicates the next state in the environment. In the RL algorithm, the action goal is to  
148 maximize the return by choosing actions with *epsilon greedy* and the optimal  $Q^*$ .

149  
150 Q-learning is an online estimation with a model-free learning method [19], [20]. It turns to  
151 a learning algorithm by putting the equation (6) into an iterative loop. The  $Q^*$  is estimated  
152 using samples of equation (6). The sample batch is computed in the environment by  
153 reward  $r_{t+1}$ , and the states of  $x_t, x_{t+1}$ :

$$154$$
$$155 \quad Q_{t+1}(x_t, a_t) = Q_t(x_t, a_t) + \alpha_t [r_{t+1} + \gamma \max_{a'} Q_t(x_{t+1}, a') - Q_t(x_t, a_t)] \quad (7)$$
$$156$$

157 The equation (7) does not have any information regarding the transition probability and  
158 reward functions; therefore, Q-learning is a model-free algorithm. The parameter  $\alpha_t \in$   
159  $(0,1]$  is the time-varying learning rate that specifies how far steps can be taken to  
160 determine the value of the batch sample ( target )  $\gamma \max_{a'} Q_t(x_{t+1}, a') - Q_t(x_t, a_t)$ . The  
161 convergence of the equation (7) has been considered and mathematically proven under  
162 the following conditions[17], [21]:

- 163
- 164 • Q-learning updated values must be stored for each state action  $Q_t(x_t, a_t)$
  - 165 • The series of time-varying learning rate for each state action  $(x_t, a_t)$  sums infinity,  
166 but the sum of its square should be finite[22]:
- 167

$$168 \quad \sum_{t=1}^{\infty} \alpha_t(x, a) = \infty \quad \text{and} \quad \sum_{t=1}^{\infty} \alpha_t^2(x, a) < \infty$$
$$169$$

- The agent should explore the environment in all states with nonzero probability.

In order to guarantee the third condition for the agent, a greedy policy is used. In this condition, at each step, the agent chooses a random action with probability of  $\varepsilon \in (0,1)$ , and the greedy action with the probability  $(1 - \varepsilon)$ . This  $\varepsilon$ -greedy technique is used to explore the environment rather than exploit in one action[23]. Another method, which is the Boltzmann exploration strategy, can be used to find the action probability by purely random action selection [24].

The difference between SARSA and Q-Learning algorithm is the Q-function update as indicated equation (8) vs (7). In the SARSA algorithm, it computes the difference between  $Q_t(x_t, a_t)$  and the weighted sum of the average action value and the maximum Q Value. In the SARSA algorithm, the target policy is always same as the behavior policy [25]:

$$Q_{t+1}(x_t, a_t) = Q_t(x_t, a_t) + \alpha_t[r_{t+1} + \gamma Q_t(x_{t+1}, a') - Q_t(x_t, a_t)] \quad (8)$$

### III. Methodology

The implementation of Q-learning for the generation of a 3D vascularization model based on the raw image data involves the following steps: In the first step, cross-sectional 2D images, such as those generated by CT or MRI medical imaging, will be converted into the 3D model to specify the inlet and outlet position of the vascular network. In the next step, the required vascularization density and number of the vessels will be specified and the 3D model will be sliced into 2D planes. In order to simulate the Q-learning algorithm to find the solution, which is the least tortuosity and least overall distance to the outer shells, the 2D slice is converted to a 2D grid plane containing both the inlet and outlet position. Tortuosity index is the ratio of the total length and preferential tortuous fluid pathways.

Q-learning solution, which is a planned path, is converted to a 2D Bezier curve and a 3D shape with the specified diameter. This 3D vascularized model is then implemented by subtraction from the initial 3D solid bone model. This results in a 3D vascularized bone model that can be 3D printed or used for *in silico* simulation.

#### A. 3D Model Reconstruction and Slicing

Medical imaging techniques, such as CT or MRI, are in widespread use for visualizing musculoskeletal anatomy and pathologies. Therefore, these data can reasonably be used to extract patient-specific 3D geometry for bioprinting [26]. One way to reconstruct the 3D model is to detect the contour in each cross-sectional image, then construct the mixed layers in a triangular STL model [27][28].

We used a human scaphoid bone for implementation of the Q-learning algorithm, which is a non-convex shape. Figure 1 shows the generated mesh of human scaphoid from CT scan data. The inlet and outlet position on the vessel are essential for optimal clinical use. As indicated in the algorithm (1), the inlet and outlet position coordinates are saved for

216 the further use in the algorithm (2). The generated 3D mesh is sliced to convert the 3D  
217 model into 2D slices. The algorithm computes each slice area and chooses the maximum  
218 size as the target plane for implementing the vascularization network. This plane is  
219 generated by the specific Z position passing from the inlet and outlet pairs  $(x_i, y_i, z_i)$  and  
220  $(x_o, y_o, z_o)$ . The next step is to generate the vascularization network in the newly generated  
221 2D plane.  
222

---

**Algorithm 1** 3D Reconstruction and Slicing

---

**Procedure** Slicing

Inlet position  $\leftarrow (x_i, y_i, z_i)$

Outlet position  $\leftarrow (x_o, y_o, z_o)$

Z-Slicing imported 3D bone  $(:, :, Z)$

$S \leftarrow$  Compute maximum area for each slice

$S_{max} \leftarrow \max(S)$

Generate 2D plane by  $S_{max}$  normal, Inlet, and outlet position

Convert 2D plane into Grid World

**End procedure**

---

223

**B. Q-learning**

224

225

226 Path planning vascularization in a 2D plane has several constraints. The algorithm should  
227 consider both the tortuosity index and the coverage area by measuring curvature distance  
228 to the model's outer shells. Therefore, it is required to look for an algorithm that can find  
229 a 2D space solution with numerous possibilities. Algorithm (2) is the general workflow for  
230 this aim.

231

232 2D grid plane from part A is generated by choosing the scaphoid slice's maximum length  
233 and width. This 2D slice is converted to the grid world as the RL algorithm environment.  
234 In the next step, the Q-learning algorithm is set up to solve this problem by maximizing  
235 reward. The policy for each position shows the path and agent decision to move in this  
236 plane. This simulation is performed with MATLAB® R2020a and Reinforcement Learning  
237 Toolbox.

238

239 RL grid world problem consists of three main components:

240

241 • **Agent:** in this scenario, as illustrated in Figure 2A, agent is the vessel that completes  
242 a path which will be used for vessel modeling. The agent does action  $a$  and the  
243 environment, which is a 2D plane, returns the  $r_{t+1}$  and  $x_{t+1}$ , which is the next state.  
244 Agent training parameters, episode information, and average results are shown in  
245 Table 1.

246

247 • **Goal:** this scenario aims to start from the inlet position and finish it at the outlet  
248 position.

249

- 250 • **Obstacles:** These obstacles are in black, as shown in Figure 2B. Agents should avoid  
251 these obstacles out of path planning areas or distance to the outer contour. The agent  
252 will receive a negative reward signal by passing over obstacles.

253  
254 This algorithm aims to train an agent to reach the goal of avoiding obstacles in the grid  
255 world so that the accumulated rewards by movements get maximized. To accomplish this  
256 aim, the agent has to discover the world and learn the environment's dynamics. A proper  
257 value for each environment section as movement, goal, and obstacles is defined.  
258 Colliding obstacles or defined boundaries, a highly negative reward signal is given to the  
259 agent.

260

---

### Algorithm 2 Q-Learning

---

#### Procedure Environment

```
Import 2D Plane ( $x\_plane$ ,  $y\_plane$ )
Import shape outline ( $x\_outline$ ,  $y\_outline$ )
Append 2D plane to shape outline
Loop:
  For  $\min(y\_plane) < y < \max(y\_plane)$ 
    For  $\min(x\_plane) < x < \max(x\_plane)$ 
      If  $x\_plane > x\_outline$  or  $x\_plane < x\_outline$ 
         $0 \leftarrow (x\_plane, y\_plane)$ 
      End if
    End for
  End for
End loop
```

#### End procedure

#### Procedure Optimize Q function

```
For number of epochs do
  Generate the Q value
  Find action  $a$  using epsilon greedy approach
  Take the action  $a$  and move to the new state  $s'$ 
  Find reward  $r$  based on tortuosity function
  Find Q value for  $(s, a, s')$ 
  Apply samples to find the optimal policy
```

#### End for

#### End procedure

---

261

### 262 C. Bezier Curve Approximation and 3D Rendering

263

264 Bezier curves were introduced by Paul de Casteljaou in early 1960s [29]. This algorithm is  
265 based on the interpolation between the pair of control points. A Bezier curve with degree  
266 of  $n$  needs  $n+1$  control point  $b_i \in R^d, i = 0, 1, \dots, n, t \in R$ :

267

$$268 \quad b_i^r(t) = (1-t)b_i^{r-1}(t) + tb_{i+1}^{r-1}(t) \quad \begin{cases} r = 1, \dots, n \\ i = 0, \dots, n-r \end{cases} \quad (9)$$

269

270 And  $b_i^0(t) = b_i \cdot b_0^n(t)$  is the point with parameter  $t$  on the Bezier curve  $b^n$ . The polygon P  
271 which is calculated by  $b_0, \dots, b_n$  is called the *Bezier polygon* of the curve  $b^n$ .  $b_i$  are called  
272 control points [30].

273  
274 Agent path planning solution as pairs of  $(x_{path,n}, y_{path,n})$  are considered as the control  
275 points  $b_0, \dots, b_n$ . Therefore, the planned path turns to a 2D Bezier curve as Figure 3. For  
276 making a 3D path with a desired diameter, a Python script on Blender [31] is programmed  
277 to convert the 2D path into 3D model. The desired diameter is considered as a relation of  
278 the difference in pressure ( $\Delta P$ ), the viscosity of the fluid ( $\mu$ ), and the vessel length ( $L$ ) [14]:  
279

$$280 \quad Q = \frac{\pi r^4 \Delta P}{8 \mu L} \quad (10)$$

281  
282 The final 3D Bezier curve will be implemented starting from the inlet position to the outlet  
283 position as pairs of  $(x_i, y_i, z_i)$   $(x_o, y_o, z_o)$ .

#### 284 285 **IV. Results**

286  
287 Different scenarios for 3D vascularization networks based on the grid world path planning  
288 with varying constraints of reward have been tested. Table 2 shows the different  
289 scenarios including number of episodes, episode Q0, average reward, and tortuosity  
290 index as a result. Figure 4A-E illustrates the different planned path based on the various  
291 reward function constraints. To validate the Q-Learning algorithm's training status using  
292 the planned path the training status for each Q0 episode, average reward, and episode  
293 reward have been plotted Figure 4F. Here, the final episode's value is converted to the  
294 desired reward value, which indicates the tortuosity index level as low, medium, or high.  
295 Algorithm picks the result which is converged and has the minimum value of tortuosity  
296 index. In this example the path planned with 1000 number of episodes is the solution for  
297 generating a vessel since it has the least tortuosity index and the plot is converged.

298  
299 Average reward reinforcement learning algorithms convergence follows the idea from a  
300 kind of Tauberian theorem; if the discount rate converges to one, it is converged to the  
301 average reward value [32]. The fact that episode reward and average reward are  
302 converged to the same value indicates the Q-learning algorithm convergence and  
303 validation of the training algorithm.

304  
305 3D vascularized scaphoid model is generated with Blender python scripts and Bezier  
306 curve approximation algorithm, as shown in Figure 5A. Using this algorithm, it is possible  
307 to generate a second vessel to increase vascular coverage in a large construct. To do so,  
308 the inlet and outlet of the second vessel is located at the main vessel with a larger  
309 diameter before and after the smaller vessel inlets and outlets. This scheme results in a  
310 more complex vascular network that remains compatible with 3D bioprinting (Figure 5B).



## 311 V. Conclusion

312

313 A model-based RL algorithm was used to generate a vascular network in patient-specific  
314 geometry with the specified inlet and outlet position, vascularization density, and  
315 tortuosity index. This model-based RL algorithm has an efficient training method without  
316 considerable computation time. Furthermore, the  $\epsilon$ -greedy Q-learning approach is a  
317 method requiring minimal computational resources for training agents in this path  
318 planning problem. With the slicing method, the grid world environment for the RL agent  
319 is extracted for the simulation. The data from this simulation was used to find the optimal  
320 policy regarding the minimum tortuosity and maximum area coverage. Finally, the  
321 planned path was converted to the Bezier curve with an approximation and then  
322 converted into a 3D model, which was then implemented in the initial 3D bone model.

323

324 Here, the generated 3D model was 3D printed to validate the geometry and vessel  
325 functionality after optimization. We note that this model simulates a single agent in the  
326 grid world, and thus limits the grid world's multi-vessel generation flexibility. In future  
327 studies, it may be required to implement a multi-agent path planning algorithm to optimize  
328 the number of vessels required for a more complex model. One such example would be  
329 the implementation of multiple independent vascular networks in the same bone  
330 construct.

331

332 Current techniques in bone grafting, and complex engineered tissues generally, are  
333 limited in size by the metabolic demands of living cells that exceed the limit of diffusion.  
334 As a result, semi-automated machine-learning generation of vascular networks provides  
335 a critical functionality for advancing bioprinted bone constructs. In turn, this study moves  
336 the field one step closer to routine clinical use of large volume, patient-specific bioprinted  
337 tissue grafts.

338 **Author Contributions:**

339

340 Conceptualization (AS, JET, MRR, RET), Investigation (AS, JET, MRR, RET), Writing  
341 (AS, JET, MRR, RET), Funding (MRR, RET).

342

343 **Acknowledgements:**

344

345 Our research is supported by the National Institute of Arthritis and Musculoskeletal and  
346 Skin Diseases and the National Institute of Dental and Craniofacial Research of the  
347 National Institutes of Health under award numbers AR074953 (RET) and DE028397  
348 (RET). The content is solely the responsibility of the authors and does not necessarily  
349 represent the official views of the funding bodies.

350 **References:**

- 351
- 352 [1] C. Mason and P. Dunnill, "A brief definition of regenerative medicine,"
- 353 *Regenerative Medicine*, vol. 3, no. 1. pp. 1–5, Jan. 2008, doi:
- 354 10.2217/17460751.3.1.1.
- 355 [2] G. M. Abouna, "Organ Shortage Crisis: Problems and Possible Solutions,"
- 356 *Transplant. Proc.*, vol. 40, no. 1, pp. 34–38, Jan. 2008, doi:
- 357 10.1016/j.transproceed.2007.11.067.
- 358 [3] D. W. Hutmacher, "Scaffolds in tissue engineering bone and cartilage,"
- 359 *Biomaterials*, vol. 21, no. 24, pp. 2529–2543, Dec. 2000, doi: 10.1016/S0142-
- 360 9612(00)00121-6.
- 361 [4] N. Beheshtizadeh, N. Lotfibakhshaiesh, Z. Pazhouhnia, M. Hoseinpour, and M.
- 362 Nafari, "A review of 3D bio-printing for bone and skin tissue engineering: a
- 363 commercial approach," *Journal of Materials Science*, vol. 55, no. 9. Springer, pp.
- 364 3729–3749, Mar. 01, 2020, doi: 10.1007/s10853-019-04259-0.
- 365 [5] S. Derakhshanfar, R. Mbeleck, K. Xu, X. Zhang, W. Zhong, and M. Xing, "3D
- 366 bioprinting for biomedical devices and tissue engineering: A review of recent
- 367 trends and advances," *Bioactive Materials*, vol. 3, no. 2. KeAi Communications
- 368 Co., pp. 144–156, Jun. 01, 2018, doi: 10.1016/j.bioactmat.2017.11.008.
- 369 [6] F. Xing, Z. Xiang, P. M. Rommens, and U. Ritz, "3D Bioprinting for Vascularized
- 370 Tissue-Engineered Bone Fabrication.," *Mater. (Basel, Switzerland)*, vol. 13, no.
- 371 10, May 2020, doi: 10.3390/ma13102278.
- 372 [7] S. V. Murphy and A. Atala, "3D bioprinting of tissues and organs," *Nature*
- 373 *Biotechnology*, vol. 32, no. 8. Nature Publishing Group, pp. 773–785, 2014, doi:
- 374 10.1038/nbt.2958.
- 375 [8] A. M. Schwartz, M. L. Schenker, J. Ahn, and N. J. Willett, "Building better bone:
- 376 The weaving of biologic and engineering strategies for managing bone loss," *J.*
- 377 *Orthop. Res.*, vol. 35, no. 9, pp. 1855–1864, Sep. 2017, doi: 10.1002/jor.23592.
- 378 [9] M. Ansari, "Bone tissue regeneration: biology, strategies and interface studies,"
- 379 *Prog. Biomater.*, vol. 8, no. 4, pp. 223–237, Dec. 2019, doi: 10.1007/s40204-019-
- 380 00125-z.
- 381 [10] J. R. Perez *et al.*, "Limb salvage reconstruction: Radiologic features of common
- 382 reconstructive techniques and their complications," *Journal of Orthopaedics*, vol.
- 383 21. Reed Elsevier India Pvt. Ltd., pp. 183–191, Sep. 01, 2020, doi:
- 384 10.1016/j.jor.2020.03.043.
- 385 [11] W. F. Enneking, J. L. Eady, and H. Burchardt, "Autogenous cortical bone grafts in
- 386 the reconstruction of segmental skeletal defects," *J. Bone Jt. Surg. - Ser. A*, vol.
- 387 62, no. 7, pp. 1039–1058, 1980, doi: 10.2106/00004623-198062070-00001.
- 388 [12] F. R. NUSBICKEL, P. C. DELL, M. P. MCANDREW, and M. M. MOORE,
- 389 "Vascularized Autografts for Reconstruction of Skeletal Defects Following Lower
- 390 Extremity Trauma: A Review," *Clin. Orthop. Relat. Res.*, vol. 243, 1989, [Online].
- 391 Available:
- 392 [https://journals.lww.com/clinorthop/Fulltext/1989/06000/Vascularized\\_Autografts\\_f](https://journals.lww.com/clinorthop/Fulltext/1989/06000/Vascularized_Autografts_f)
- 393 [or\\_Reconstruction\\_of.10.aspx](https://journals.lww.com/clinorthop/Fulltext/1989/06000/Vascularized_Autografts_f).
- 394 [13] S. Wolfe, *Green's Operative Hand Surgery, 2-Volume Set - 7th Edition*, 7th ed.,
- 395 vol. 2. .

- 396 [14] R. E. Tomlinson and M. J. Silva, "Skeletal Blood Flow in Bone Repair and  
397 Maintenance," *Bone Research*, vol. 1, no. 1. Sichuan University, pp. 311–322,  
398 Dec. 31, 2013, doi: 10.4248/BR201304002.
- 399 [15] L. P. Kaelbling, M. L. Littman, and A. W. Moore, "Reinforcement Learning: A  
400 Survey," *J. Artif. Intell. Res.*, vol. 4, pp. 237–285, Apr. 1996, Accessed: Sep. 02,  
401 2020. [Online]. Available: <http://arxiv.org/abs/cs/9605103>.
- 402 [16] R. Sutton, "Introduction to Reinforcement Learning R A I L &."
- 403 [17] L. B. Bus, oniu, R. Babuška, B. De Schutter, L. B. Bus, oniu, R. Babuška, and B.  
404 De Schutter, "A comprehensive survey of multi-agent reinforcement learning,"  
405 2008.
- 406 [18] C. J. C. H. Watkins and P. Dayan, "Technical Note: Q-Learning," *Mach. Learn.*,  
407 vol. 8, no. 3, pp. 279–292, 1992, doi: 10.1023/A:1022676722315.
- 408 [19] J. Peng and R. J. Williams, "Incremental multi-step Q-learning," *Mach. Learn.*, vol.  
409 22, no. 1–3, pp. 283–290, Jan. 1996, doi: 10.1007/BF00114731.
- 410 [20] R. S. Sutton, "Learning to predict by the methods of temporal differences," *Mach.*  
411 *Learn.*, vol. 3, no. 1, pp. 9–44, Aug. 1988, doi: 10.1007/bf00115009.
- 412 [21] J. N. Tsitsiklis, "Asynchronous Stochastic Approximation and Q-Learning," 1994.
- 413 [22] E. Szepesvari, "The Asymptotic Convergence-Rate of Q-learning."
- 414 [23] M. Tokic and G. Palm, "Value-difference based exploration: Adaptive control  
415 between epsilon-greedy and softmax," in *Lecture Notes in Computer Science*  
416 *(including subseries Lecture Notes in Artificial Intelligence and Lecture Notes in*  
417 *Bioinformatics)*, 2011, vol. 7006 LNAI, pp. 335–346, doi: 10.1007/978-3-642-  
418 24455-1\_33.
- 419 [24] N. Cesa-Bianchi, C. Gentile, G. Lugosi, and G. Neu, "Boltzmann Exploration Done  
420 Right," *Adv. Neural Inf. Process. Syst.*, vol. 2017-December, pp. 6285–6294, May  
421 2017, Accessed: Sep. 02, 2020. [Online]. Available:  
422 <http://arxiv.org/abs/1705.10257>.
- 423 [25] E. M. Russek, I. Momennejad, M. M. Botvinick, S. J. Gershman, and N. D. Daw,  
424 "Predictive representations can link model-based reinforcement learning to model-  
425 free mechanisms," *PLoS Comput. Biol.*, vol. 13, no. 9, p. e1005768, Sep. 2017,  
426 doi: 10.1371/journal.pcbi.1005768.
- 427 [26] B. Preim and D. Bartz, *Visualization in Medicine: Theory, Algorithms, and*  
428 *Applications*. San Francisco, CA, USA: Morgan Kaufmann Publishers Inc., 2007.
- 429 [27] C. S. Wang, W. H. A. Wang, and M. C. Lin, "STL rapid prototyping bio-CAD model  
430 for CT medical image segmentation," *Comput. Ind.*, vol. 61, no. 3, pp. 187–197,  
431 Apr. 2010, doi: 10.1016/j.compind.2009.09.005.
- 432 [28] R. Maksimovic, S. Stankovic, and D. Milovanovic, "Computed tomography image  
433 analyzer: 3D reconstruction and segmentation applying active contour models -  
434 'Snakes,'" *Int. J. Med. Inform.*, vol. 58–59, pp. 29–37, Sep. 2000, doi:  
435 10.1016/S1386-5056(00)00073-3.
- 436 [29] T. Kmet and M. Kmetova, "Bézier curve parametrisation and echo state network  
437 methods for solving optimal control problems of SIR model," *BioSystems*, vol.  
438 186, p. 104029, Dec. 2019, doi: 10.1016/j.biosystems.2019.104029.
- 439 [30] G. Farin, *Curves and surfaces for computer-aided geometric design: a practical*  
440 *guide*. 2014.
- 441 [31] R. Hess, *Blender Foundations: The Essential Guide to Learning Blender 2.6*.

- 442 Focal Press, 2010.
- 443 [32] D. P. Bertsekas and J. N. Tsitsiklis, “Neuro-dynamic programming: an overview,”
- 444 in *Proceedings of 1995 34th IEEE Conference on Decision and Control*, vol. 1, pp.
- 445 560–564, doi: 10.1109/CDC.1995.478953.

446 **TABLES**

447

**Table 1. Training Parameters**

| Agent Training Parameters  | Value         |
|----------------------------|---------------|
| Maximum Steps Per Episode  | 50            |
| Epsilon                    | 0.4           |
| Stop Training Value        | 1000 episodes |
| Maximum Number of Episodes | 1000          |
| Elapsed Time               | 108 seconds   |
| Episode Steps              | 13            |
| Episode Reward             | -50           |
| Episode Q0                 | -47           |
| Total Number of steps      | 22966         |
| Average Reward             | -57           |
| Average Steps              | 14.4          |

448

**Table 2. Comparison of path planning in a grid world**

| Maximum number of Episodes | Average Rewards | Tortuosity Index | Episode Q0 | Converged |
|----------------------------|-----------------|------------------|------------|-----------|
| 200                        | -78.8           | 1.4              | -49.9      | No        |
| 400                        | -60             | 1.3              | -56        | Yes       |
| 700                        | -77             | 1.3              | -56        | No        |
| 1000                       | -57             | 1.16             | -47        | Yes       |
| 1500                       | -114            | 1.5              | -65        | No        |

450 **FIGURES**  
451

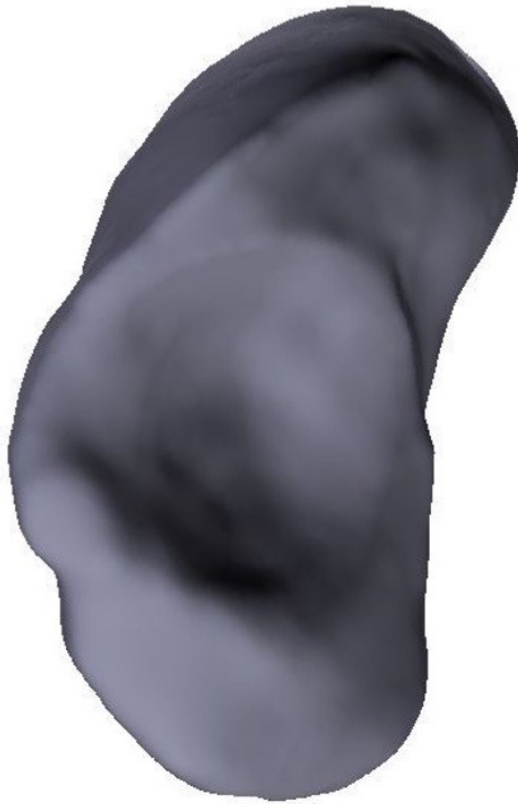

452  
453  
454 **Figure 1. Scaphoid 3D Model.** Reconstruction of the scaphoid bone from imaging data  
455 illustrates its non-convex surface.



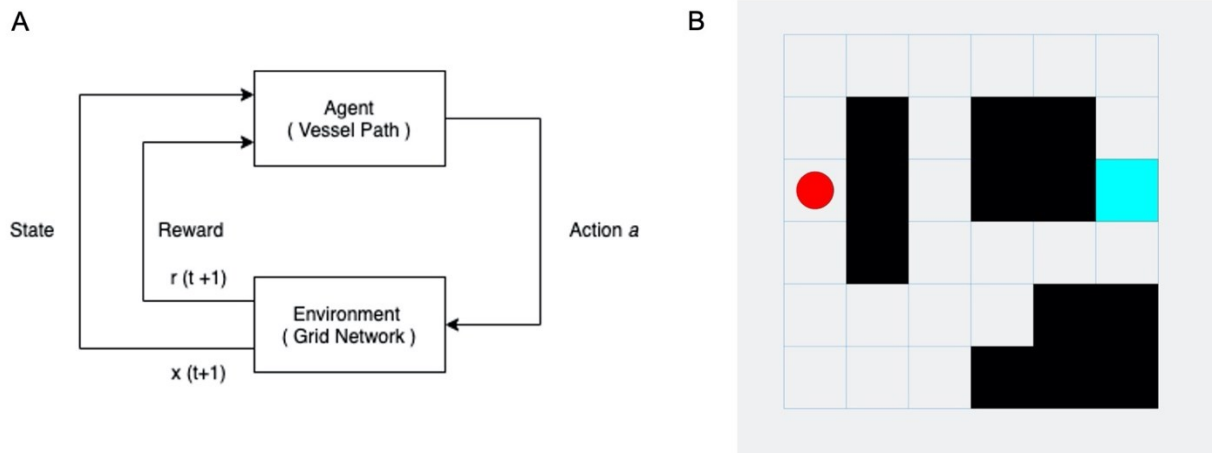

456  
457

458 **Figure 2. Reinforcement Learning Environment.** A) The Reinforcement Learning  
459 workflow in which the agent (vessel) takes action  $a$  in the grid world environment. The  
460 environment returns  $r_{t+1}$  and the next state  $x_{t+1}$ . B) The grid world used to train the agent  
461 to find the path with least tortuosity between the inlet (red) and outlet (blue), where  
462 obstacles (defined avascular areas or boundaries) are black.

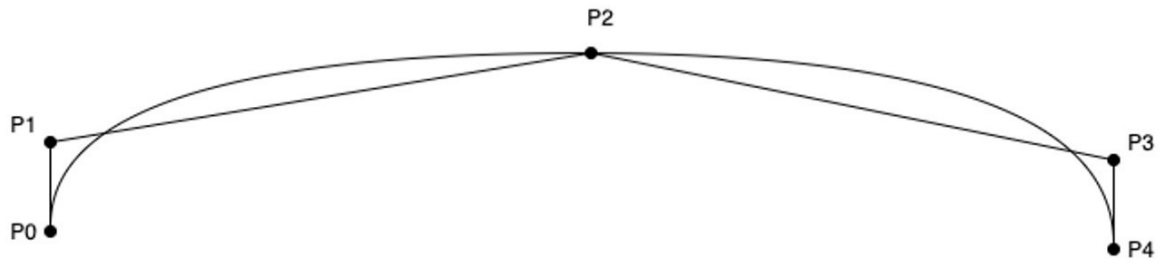

463

464

465

**Figure 3. Bezier Curve.** A vessel as defined by the Bezier Curve calculated from the four control points  $[p_1, p_2, p_3, p_4]$ .

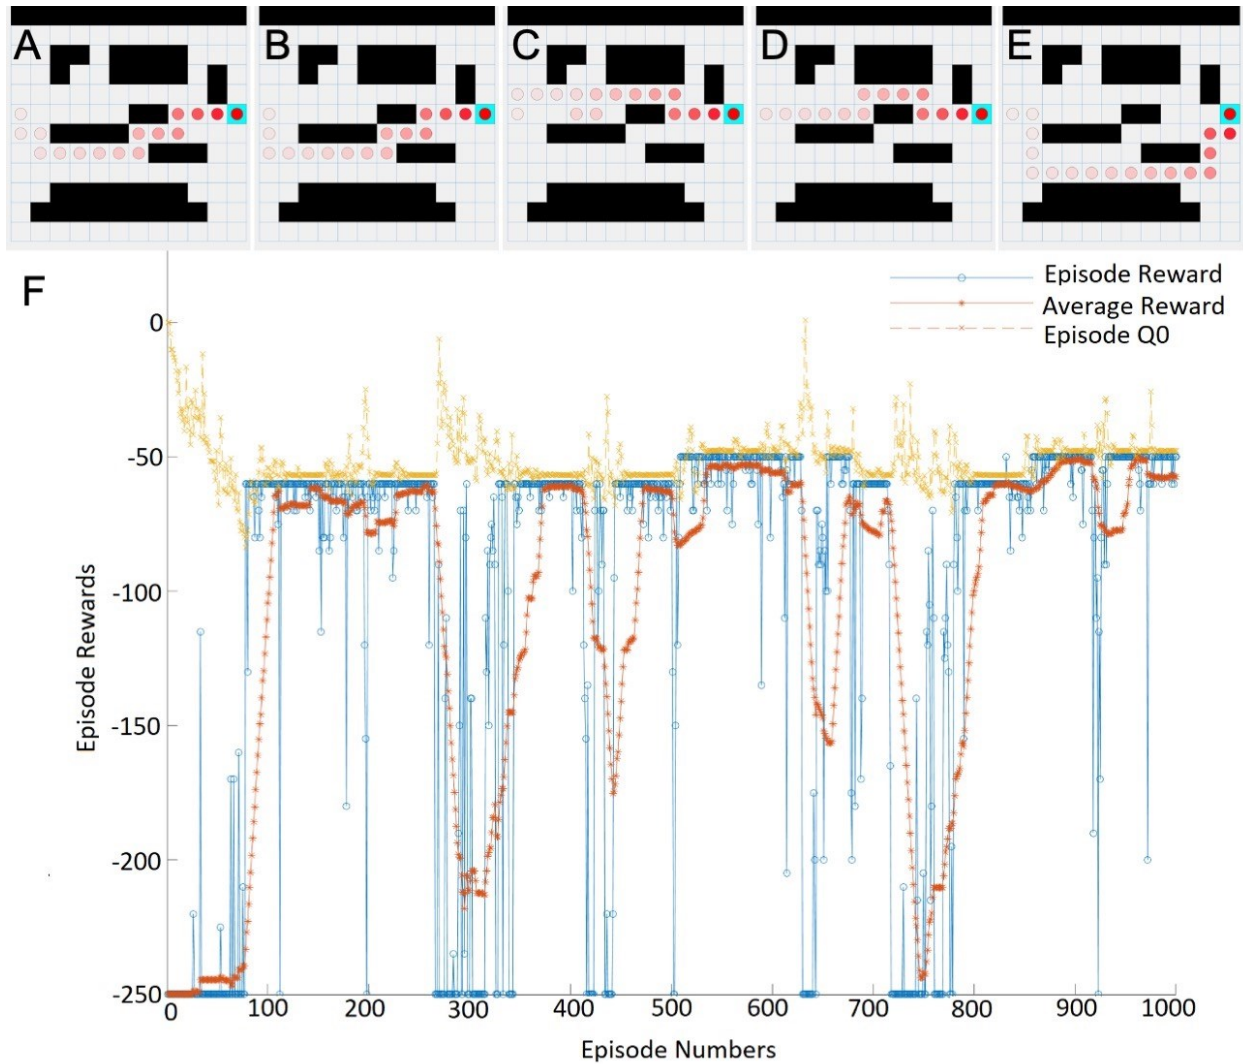

466  
467  
468  
469  
470  
471

**Figure 4. Path Planning in grid world and RL Training result.** A-E) Path planned for vessel transiting from the inlet to the outlet in the grid world following A) 200, B) 400, C) 700, D) 1000, and E) 1500 episodes. F) Results of Q-learning algorithm for 1000 episodes.

A

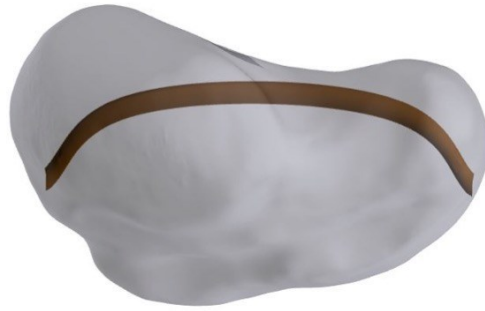

B

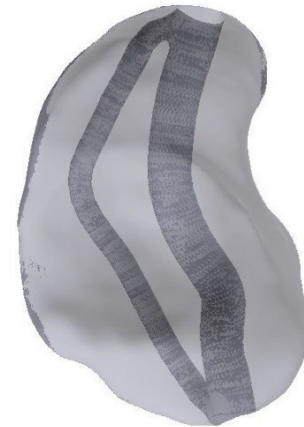

472  
473

474 **Figure 5. Rendering of vessel generated by Q-learning.** A) Path planned for the  
475 scaphoid geometry by Q-learning has been converted to a Bezier curve and  
476 implemented in 3D. B) Path planned for a second vessel within vascularized scaphoid  
477 by locating the inlet and outlet on the first vessel.
